# Supplementary material for: Revealing the effect of additive molecular structure on inducing spherulitic growth of l -isoleucine
Source: Royal Society of Chemistry journal article supplement (doi:10.1039/d5ce01014d), 2026-01-01
Supplement: d5ce01014d1.pdf [file d5ce01014d1.pdf]

## Revealing the Effect of Additive Molecular Structure on Inducing Spherulitic Growth of L-Isoleucine

Hua Huang<sup>a,b</sup>, Min Li<sup>a,b</sup>, Hanyu Guo<sup>a,b</sup>, Fujian Li<sup>a,b</sup>, Zhenkai Cen<sup>a,b</sup>, Zixin Luo<sup>a,b</sup>, Mingyang Chen<sup>a,b,\*</sup>, Dandan Han<sup>a,b,\*</sup>

<sup>a</sup> School of Chemical Engineering and Technology, State Key Laboratory of Chemical Engineering, Tianjin University, Tianjin 300072, People's Republic of China.

<sup>b</sup> The Co-Innovation Center of Chemistry and Chemical Engineering of Tianjin, Tianjin 300072, People's Republic of China.

\* Corresponding authors: handandan@tju.edu.cn (D. Han).

Table S1. Detailed information on the materials used

| Materials  | CAS No.   | Specification               |
|------------|-----------|-----------------------------|
| L-Ile      | 73-32-5   | Purity: 99%                 |
| L-Ala      | 56-41-7   | Purity: 99%                 |
| L-Val      | 72-18-4   | Purity: 99%                 |
| L-Phe      | 63-91-2   | Purity: 99%                 |
| L-Ser      | 56-45-1   | Purity: 99%                 |
| L-Tyr      | 60-18-4   | Purity: 99%                 |
| L-Lys      | 56-87-1   | Purity: 99%                 |
| MC         | 9004-67-5 | Viscosity: 1500 mPa·s       |
| HEC I      |           | Viscosity: 80-120 mPa·s     |
| HEC II     | 9004-62-0 | Viscosity: 1000-1500 mPa·s  |
| HEC III    |           | Viscosity: 8000-12000 mPa·s |
| CMC-Na I   |           | Viscosity: 50-100 mPa·s     |
| CMC-Na II  | 9004-32-4 | Viscosity: 1200-1500 mPa·s  |
| CMC-Na III |           | Viscosity: 8000-12000 mPa·s |

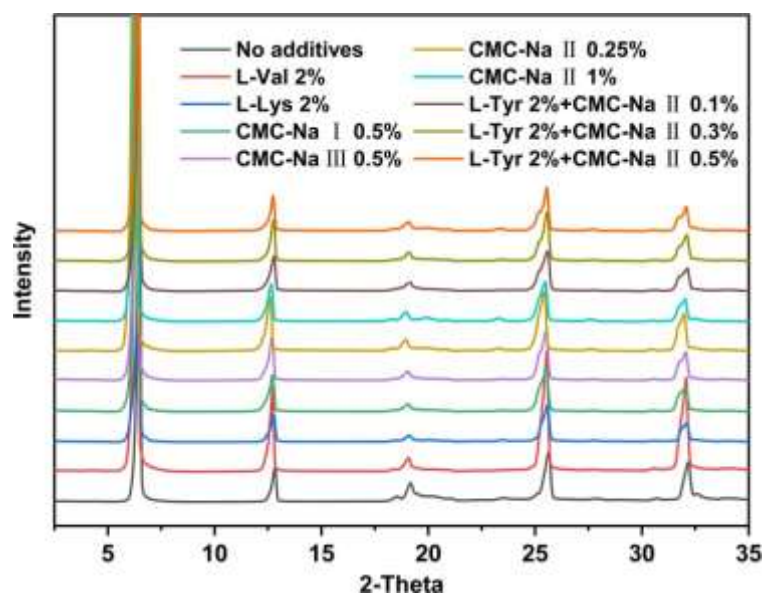

Figure S1. PXRD pattern of pure L-isoleucine crystals and those modified by various additives.

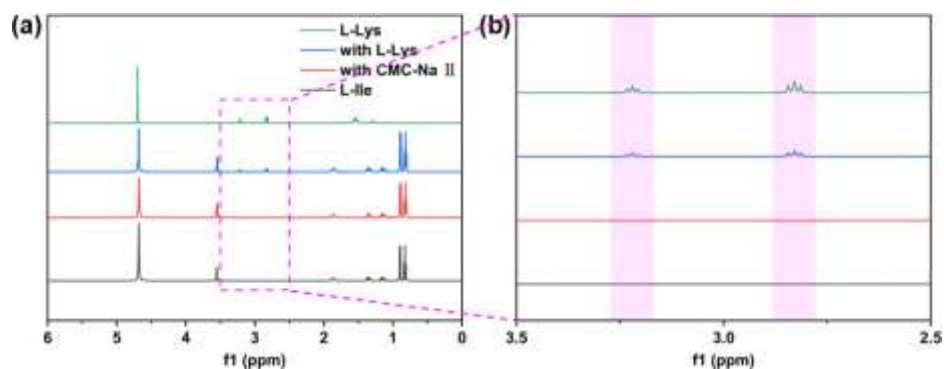

Figure S2.  $^1\text{H}$  NMR spectra (using  $\text{D}_2\text{O}$  as the solvent at 25 °C, operating at 500 MHz) of L-isoleucine products with different additive conditions and pure L-Lys.

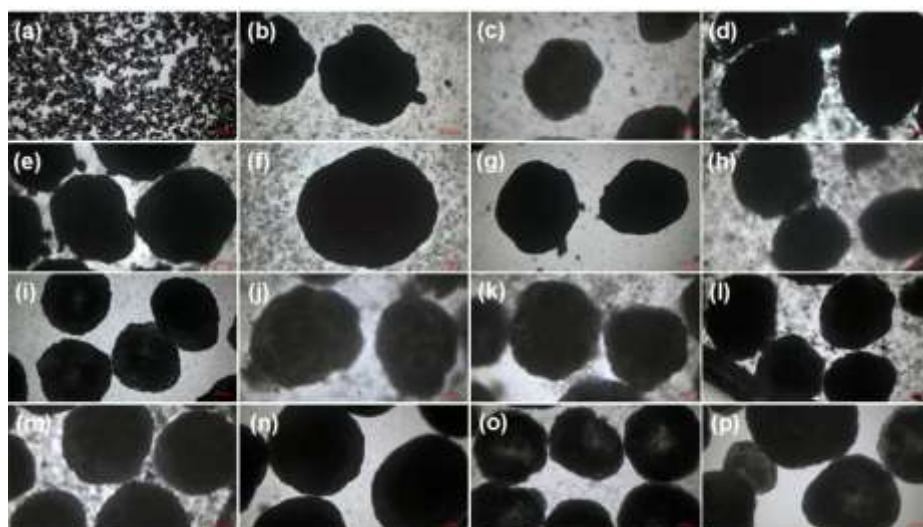

Figure S3. Optical microscope images of L-isoleucine under different additive conditions: (a) no additive, (b) with L-Ala at 2%, (c) with L-Val at 2%, (d) with L-Phe at 2%, (e) with L-Ser at 2%, (f) with L-Lys at 2%, (g) with L-Tyr at 2%, (h) with HEC at 0.5%, (i) with CMC-Na II at 0.5%, (j) with CMC-Na I at 0.5%, (k) with CMC-Na III at 0.5%, (l) with CMC-Na II at 0.25%, (m) with CMC-Na II at 1%, (n) with L-Tyr at 2% and CMC-Na II at 0.1%, (o) with L-Tyr at 2% and CMC-Na II at 0.3%, (p) with L-Tyr at 2% and CMC-Na II at 0.5%.

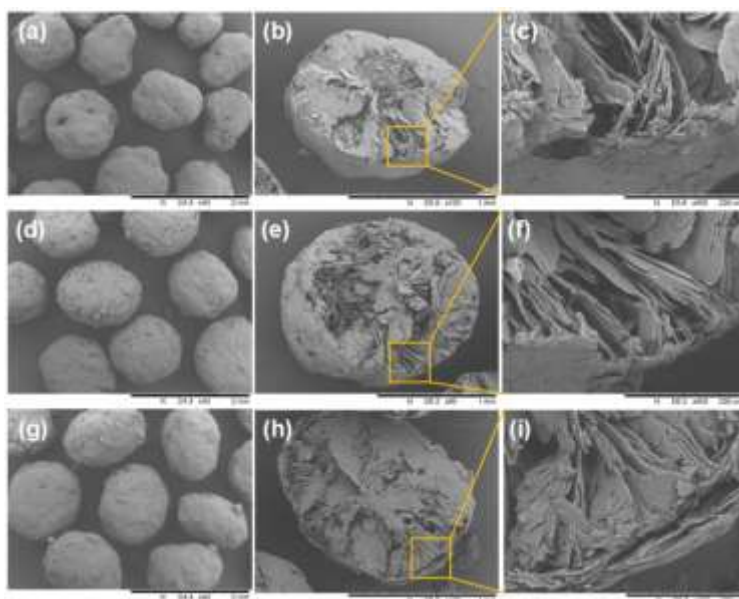

Figure S4. SEM images showing the morphology of L-isoleucine crystals grown in the presence of different amino acid additives: (a-c) L-Ala, (d-f) L-Phe, and (g-i) L-Ser. (a, d, g) Overall surface morphology. (b, e, h) Cross-section morphology. (c, f, i) Close-up views of the cross-sections.

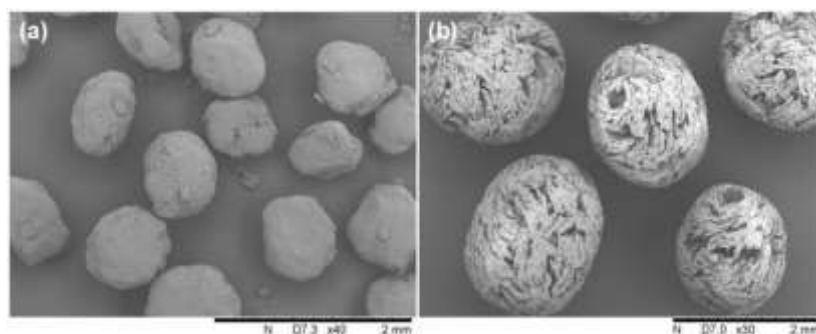

Figure S5. SEM images of L-isoleucine under different additive conditions with: (a) L-Val at 2%, (b) L-Lys at 2%.

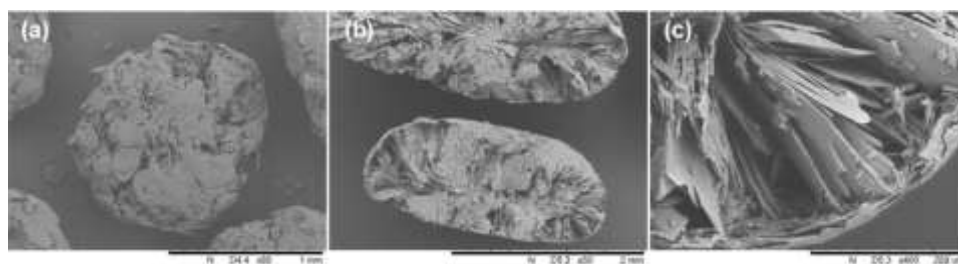

Figure S6. SEM images of L-isoleucine crystals grown with MC as an additive: (a) overall surface morphology, (b) cross-section morphology, (c) close-up view of the cross-section.

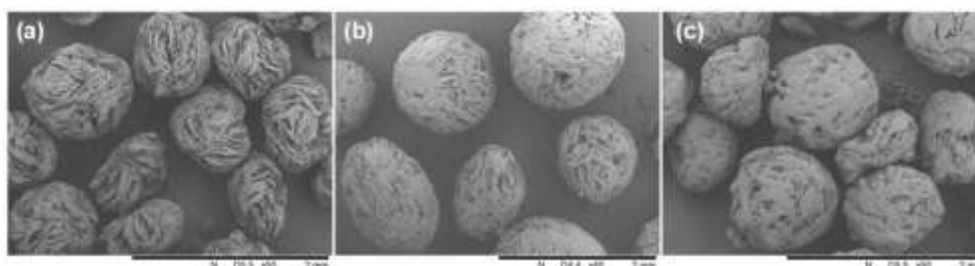

Figure S7. SEM images of L-isoleucine under the action of CMC-Na II at (a) 0.25%, (b) 0.5%, (c) 1%.

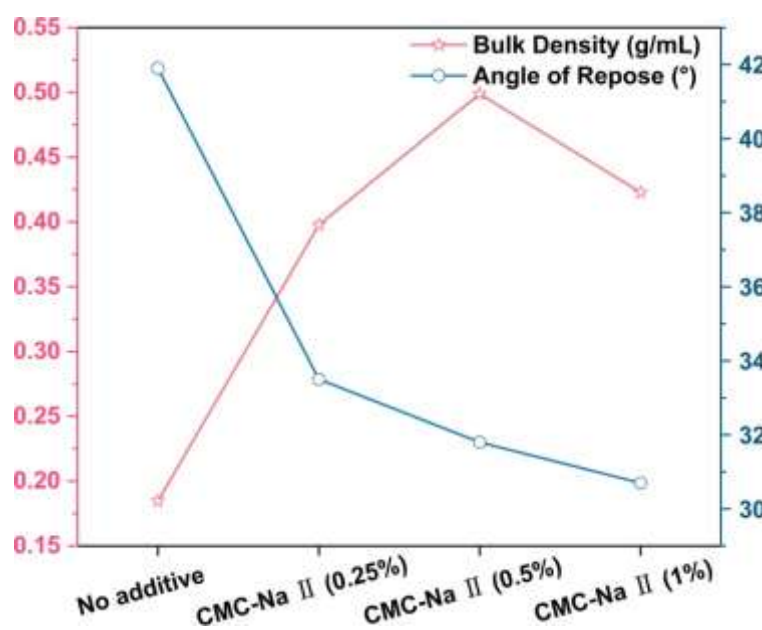

Figure S8. Effect of additive concentration on powder properties of L-isoleucine crystal products.

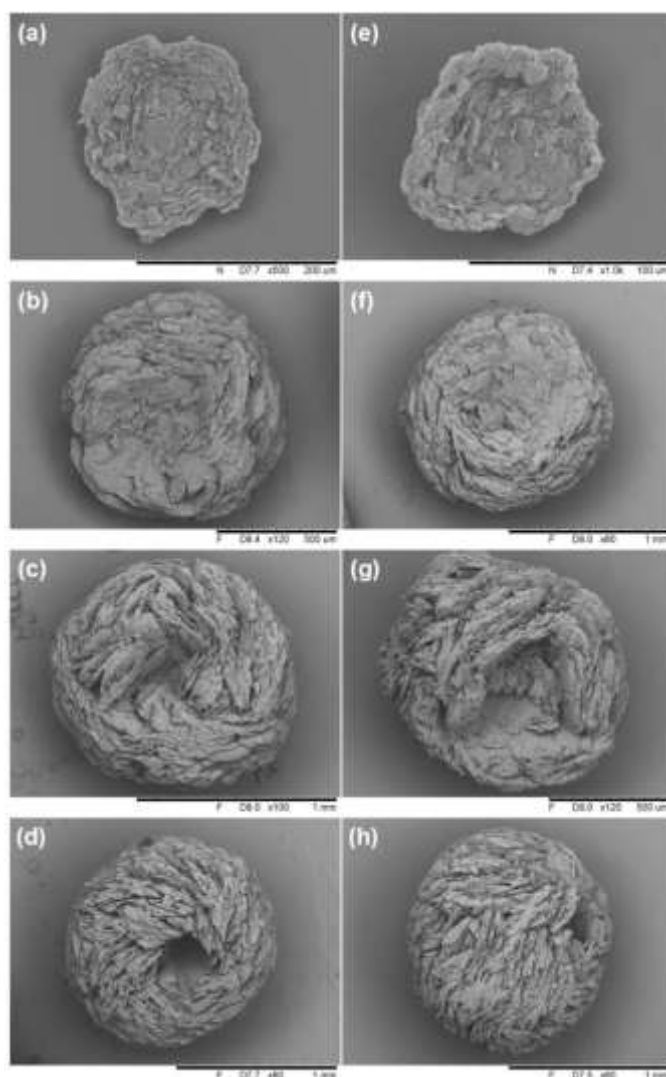

Figure S9. SEM images showing the morphological evolution of the L-isoleucine spherulite evaporated at a rate of 0.5 mL/min, temperature of 70°C, and addition of (a–d) 0.5% CMC-Na II, (e–h) 2% L-Tyr and 0.3% CMC-Na II.

Table S2. The BET specific surface area of L-isoleucine crystal samples under different conditions.

| Additives (wt%)  | Specific surface area (m <sup>2</sup> /g) |
|------------------|-------------------------------------------|
| L-Ala (2%)       | 0.31                                      |
| L-Ser (2%)       | 0.49                                      |
| L-Phe (2%)       | 0.78                                      |
| L-Tyr (2%)       | 1.51                                      |
| MC (0.5%)        | 0.39                                      |
| HEC II (0.5%)    | 0.75                                      |
| CMC-Na II (0.5%) | 1.09                                      |

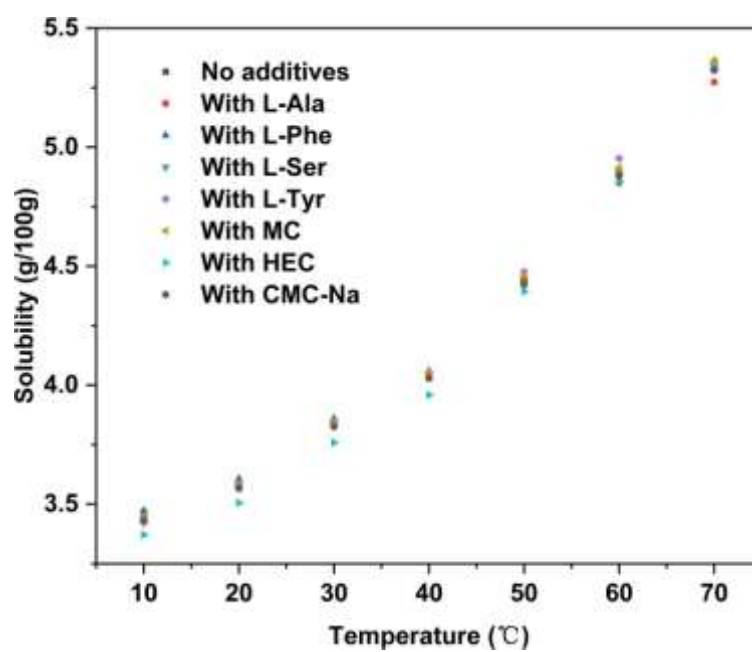

Figure S10. Mass fraction solubility of L-isoleucine in pure water or with additives at different temperatures.
